# Supplementary material for: Adolescent choices and caregiver roles: Understanding individual and interpersonal influences on sexual decision-making in South Africa
Source: PubMed Central journal article supplement (PMC11627436; doi:10.1371/journal.pgph.0003569), 2024-12-09
Supplement: pgph.0003569.s003.pdf [file pgph.0003569.s003.pdf]

**Consolidated criteria for reporting qualitative studies (COREQ): 32-item checklist for manuscript in title:**

**“Adolescent choices and caregiver roles: Understanding individual and interpersonal influences on sexual decision-making in South Africa”**

| No                                             | Item                                     | Guide questions/description                                                                                                                                     | Response                                                                                                                               |
|------------------------------------------------|------------------------------------------|-----------------------------------------------------------------------------------------------------------------------------------------------------------------|----------------------------------------------------------------------------------------------------------------------------------------|
| <b>Domain 1: Research team and reflexivity</b> |                                          |                                                                                                                                                                 |                                                                                                                                        |
| Personal Characteristics                       |                                          |                                                                                                                                                                 |                                                                                                                                        |
| 1.                                             | Interviewer/facilitator                  | Which author/s conducted the interview or focus group?                                                                                                          | Done<br>It is mentioned in the method lines 169 to 176                                                                                 |
| 2.                                             | Credentials                              | What were the researcher's credentials? <i>E.g. PhD, MD</i>                                                                                                     | Done<br>It is mentioned in the method lines 169 to 176                                                                                 |
| 3.                                             | Occupation                               | What was their occupation at the time of the study?                                                                                                             | Done<br>It is mentioned in the method lines 169 to 176                                                                                 |
| 4.                                             | Gender                                   | Was the researcher male or female?                                                                                                                              | Done<br>It is mentioned in the method lines 169 to 176                                                                                 |
| 5.                                             | Experience and training                  | What experience or training did the researcher have?                                                                                                            | Done<br>It is mentioned in the method line 171                                                                                         |
| Relationship with participants                 |                                          |                                                                                                                                                                 |                                                                                                                                        |
| 6.                                             | Relationship established                 | Was a relationship established prior to study commencement?                                                                                                     | No                                                                                                                                     |
| 7.                                             | Participant knowledge of the interviewer | What did the participants know about the researcher? <i>e.g. personal goals, reasons for doing the research</i>                                                 | Participants and interviewers maintained professional relationships up until the end of the study, mentioned in methods, lines 174-176 |
| 8.                                             | Interviewer characteristics              | What characteristics were reported about the interviewer/facilitator? <i>e.g. Bias, assumptions, reasons and interests in the research topic</i>                | None                                                                                                                                   |
| <b>Domain 2: study design</b>                  |                                          |                                                                                                                                                                 |                                                                                                                                        |
| Theoretical framework                          |                                          |                                                                                                                                                                 |                                                                                                                                        |
| 9.                                             | Methodological orientation and Theory    | What methodological orientation was stated to underpin the study? <i>e.g. grounded theory, discourse analysis, ethnography, phenomenology, content analysis</i> | <i>thematic analysis</i><br>It is mentioned in the method section, lines 189 to 194                                                    |
| Participant selection                          |                                          |                                                                                                                                                                 |                                                                                                                                        |
| 10.                                            | Sampling                                 | How were participants selected? <i>e.g. purposive, convenience, consecutive, snowball</i>                                                                       | <i>Convenience</i><br>It is mentioned in the method section, lines 151 to 153                                                          |
| 11.                                            | Method of approach                       | How were participants approached? <i>e.g. face-to-face, telephone, mail, email</i>                                                                              | <i>In-person</i><br>It is mentioned in the method section, lines 156                                                                   |
| 12.                                            | Sample size                              | How many participants were in the study?                                                                                                                        | 17 adolescents and 19 caregivers<br>It is mentioned in the results section, lines 215 & 223                                            |
| 13.                                            | Non-participation                        | How many people refused to participate or dropped out? Reasons?                                                                                                 | 0                                                                                                                                      |

|                                        |                                |                                                                                                                                          |                                                                                                      |
|----------------------------------------|--------------------------------|------------------------------------------------------------------------------------------------------------------------------------------|------------------------------------------------------------------------------------------------------|
|                                        |                                |                                                                                                                                          | Not mentioned, assumed by sampling technique used.                                                   |
| <b>Setting</b>                         |                                |                                                                                                                                          |                                                                                                      |
| 14.                                    | Setting of data collection     | Where was the data collected? e.g. <i>home, clinic, workplace</i>                                                                        | <i>Research centre</i><br>It is mentioned in the method section, line 137                            |
| 15.                                    | Presence of non-participants   | Was anyone else present besides the participants and researchers?                                                                        | 0<br>Not mentioned, assumed by sampling technique used.                                              |
| 16.                                    | Description of sample          | What are the important characteristics of the sample? e.g. <i>demographic data, date</i>                                                 | Done<br>It is mentioned in the method lines 136 to 153                                               |
| <b>Data collection</b>                 |                                |                                                                                                                                          |                                                                                                      |
| 17.                                    | Interview guide                | Were questions, prompts, guides provided by the authors? Was it pilot tested?                                                            | Done<br>It is mentioned in the method lines 163 to 169                                               |
| 18.                                    | Repeat interviews              | Were repeat interviews carried out? If yes, how many?                                                                                    | No<br>Not mentioned                                                                                  |
| 19.                                    | Audio/visual recording         | Did the research use audio or visual recording to collect the data?                                                                      | Yes<br>It is mentioned in the method section, lines 184 to 187.                                      |
| 20.                                    | Field notes                    | Were field notes made during and/or after the interview or focus group?                                                                  | Yes<br>It is mentioned in the method section, lines 184 to 187.                                      |
| 21.                                    | Duration                       | What was the duration of the interviews or focus group?                                                                                  | It is mentioned in the method section, lines 160 to 161.                                             |
| 22.                                    | Data saturation                | Was data saturation discussed?                                                                                                           | No<br>Limitations mentioned, lines 425 to 430.                                                       |
| 23.                                    | Transcripts returned           | Were transcripts returned to participants for comment and/or correction?                                                                 | No<br>Not mentioned                                                                                  |
| <b>Domain 3: analysis and findings</b> |                                |                                                                                                                                          |                                                                                                      |
| <b>Data analysis</b>                   |                                |                                                                                                                                          |                                                                                                      |
| 24.                                    | Number of data coders          | How many data coders coded the data?                                                                                                     | There was one coder and two reliability checkers.<br>Mentioned in methods section, lines 189 to 192. |
| 25.                                    | Description of the coding tree | Did authors provide a description of the coding tree?                                                                                    | Mentioned lines 189 to 192, which informed theme levels provided in Table 1.                         |
| 26.                                    | Derivation of themes           | Were themes identified in advance or derived from the data?                                                                              | Mentioned lines 189 to 192, which informed theme levels provided in Table 1.                         |
| 27.                                    | Software                       | What software, if applicable, was used to manage the data?                                                                               | It is mentioned in the method section line 189                                                       |
| 28.                                    | Participant checking           | Did participants provide feedback on the findings?                                                                                       | No<br>Not mentioned                                                                                  |
| <b>Reporting</b>                       |                                |                                                                                                                                          |                                                                                                      |
| 29.                                    | Quotations presented           | Were participant quotations presented to illustrate the themes / findings? Was each quotation identified? e.g. <i>participant number</i> | Done                                                                                                 |
| 30.                                    | Data and findings consistent   | Was there consistency between the data presented and the findings?                                                                       | Done                                                                                                 |
| 31.                                    | Clarity of major themes        | Were major themes clearly presented in the findings?                                                                                     | Done                                                                                                 |

|     |                         |                                                                        |                                                                                                         |
|-----|-------------------------|------------------------------------------------------------------------|---------------------------------------------------------------------------------------------------------|
| 32. | Clarity of minor themes | Is there a description of diverse cases or discussion of minor themes? | Table 1 shows the socioecological model (SEM) level, and the themes that emerged for the two SEM levels |
|-----|-------------------------|------------------------------------------------------------------------|---------------------------------------------------------------------------------------------------------|
